# Supplementary material for: The molecular mechanism of nuclear transport revealed by atomic-scale measurements
Source: eLife journal article supplement (doi:10.7554/elife.10027), 2015-09-15

**A: FSFG-K in cell**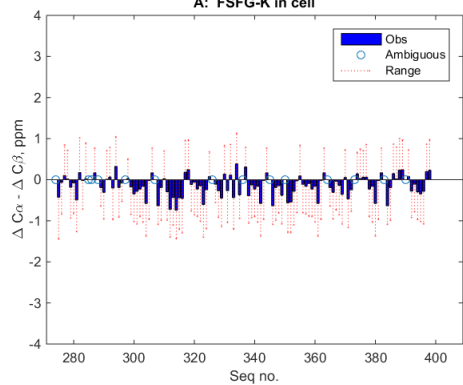**B: FSFG-K in buffer**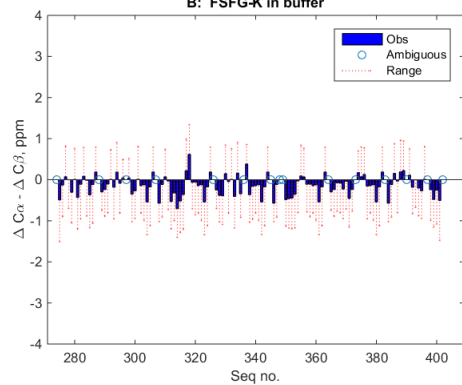**C: Extended FSFG-K in buffer**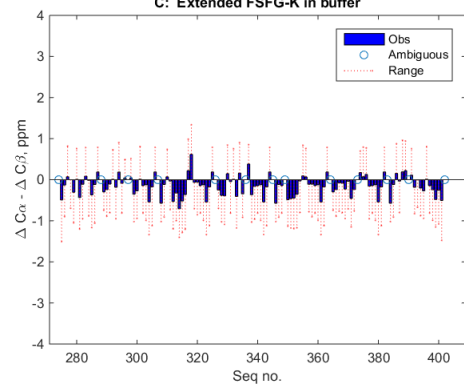**D: Sequence extended FSFG-K in cell**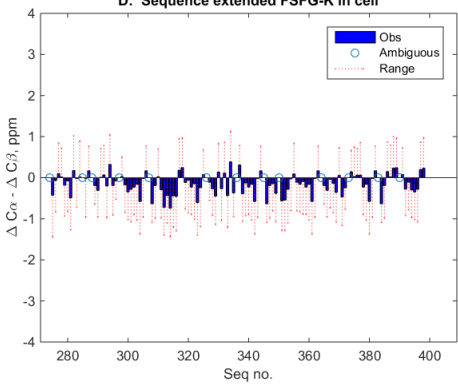**E: FG-N in cell**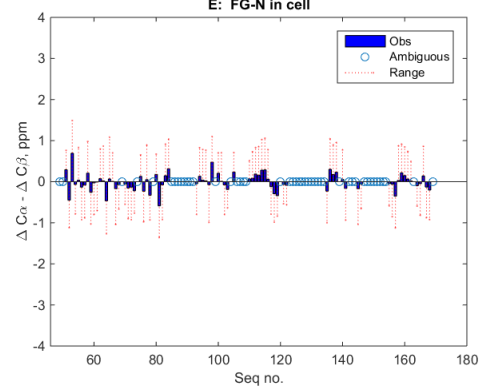**F: Seq extended FG-N in cell**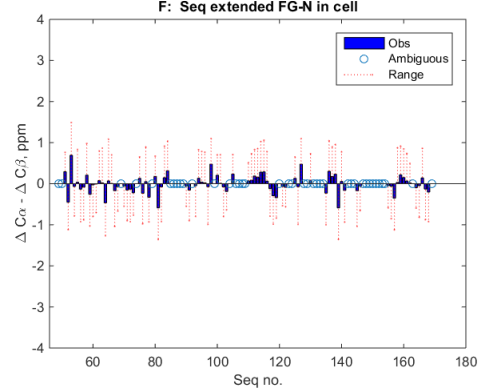**G: FG-N in Buffer D**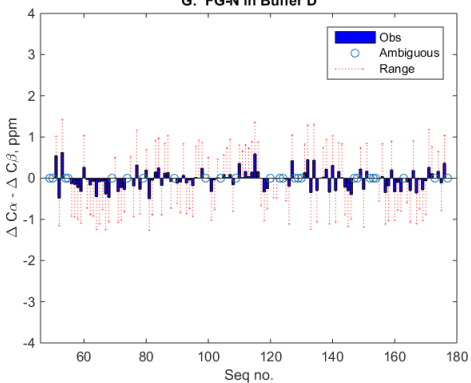**H: Sequence extended FG-N in Buffer D**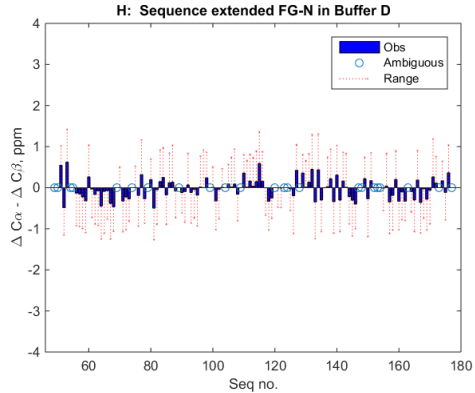

Supplement: supp [file elife_poa_e10027_Figure_1_figure_supplement_1.pdf › elife_poa_e10027_Figure_1_figure_supplement_1.pdf]
