# Supplementary material for: The molecular mechanism of nuclear transport revealed by atomic-scale measurements
Source: eLife journal article supplement (doi:10.7554/elife.10027), 2015-09-15
Supplement: supp [file elife_poa_e10027_Supplementary_File_1.docx]

## Supplementary file 1. FG constructs prepared.
