# Supplementary material for: The molecular mechanism of nuclear transport revealed by atomic-scale measurements
Source: eLife journal article supplement (doi:10.7554/elife.10027), 2015-09-15
Supplement: supp [file elife_poa_e10027_Supplementary_File_2.docx]

## Supplementary file 2. Sequence assignments filed with BRMB123.

| FGFG-K in cell *E. coli* expression | 25182 |
| --- | --- |
| FSFG-K in buffer | 25183 |
| FG-N in cell *E. coli* expression | 25184 |
| FG-N in buffer | 25185 |
