# Supplementary figures and images for: The molecular mechanism of nuclear transport revealed by atomic-scale measurements
Source: eLife journal article supplement (doi:10.7554/elife.10027), 2015-09-15

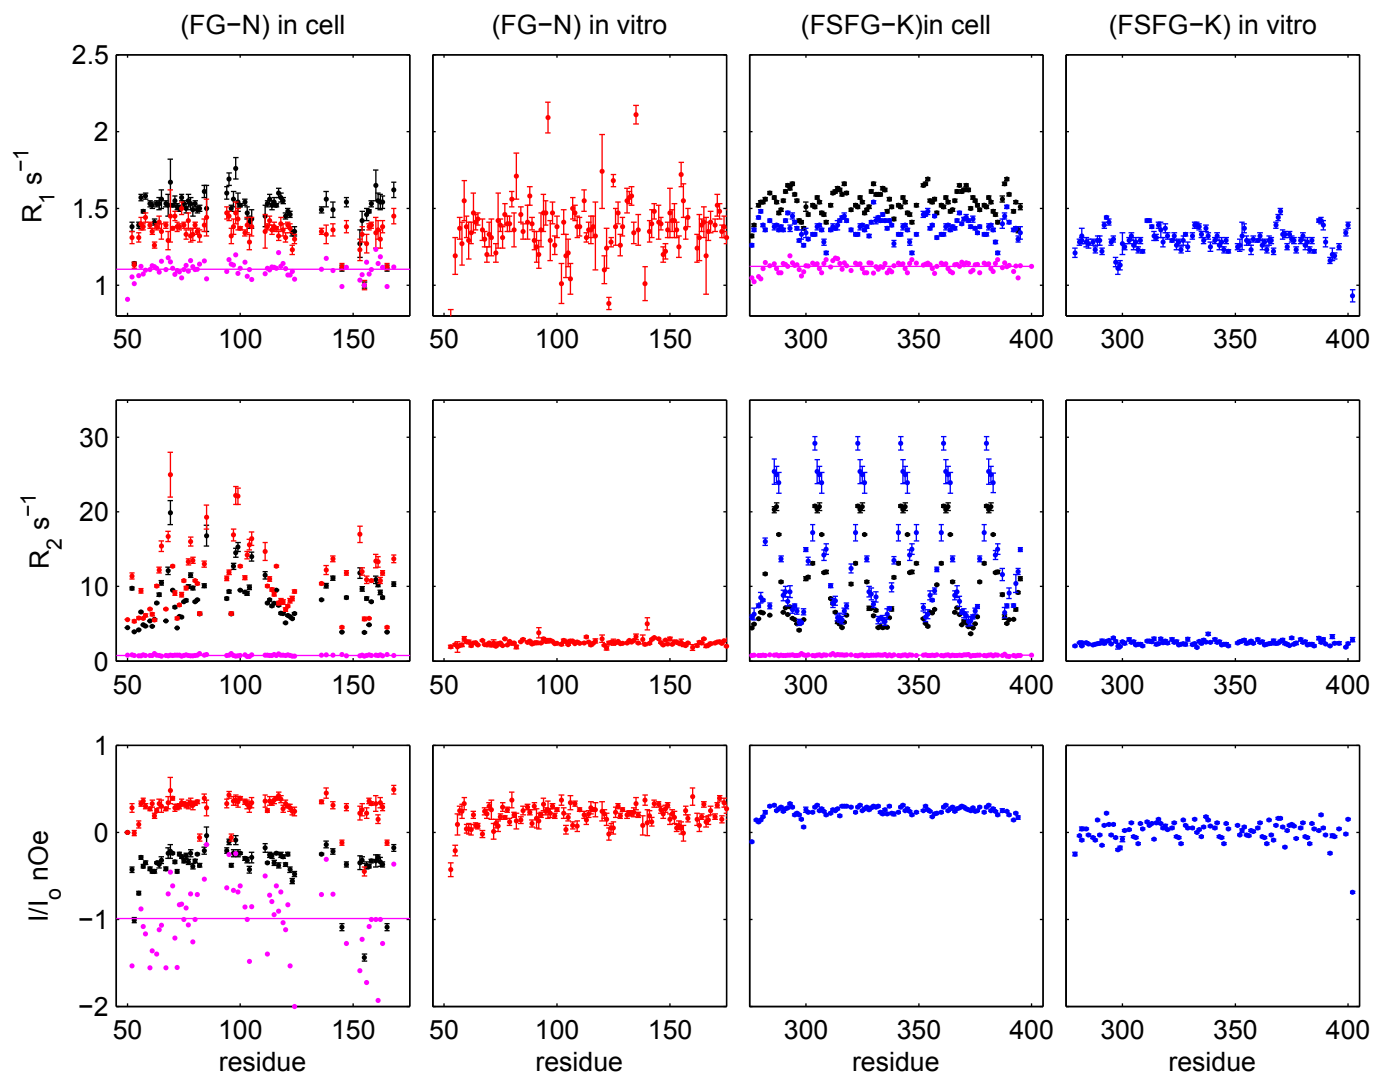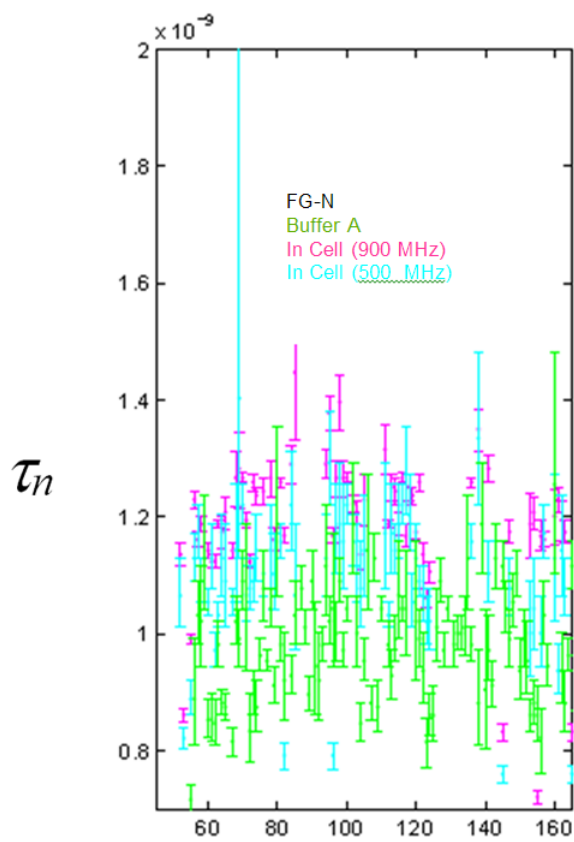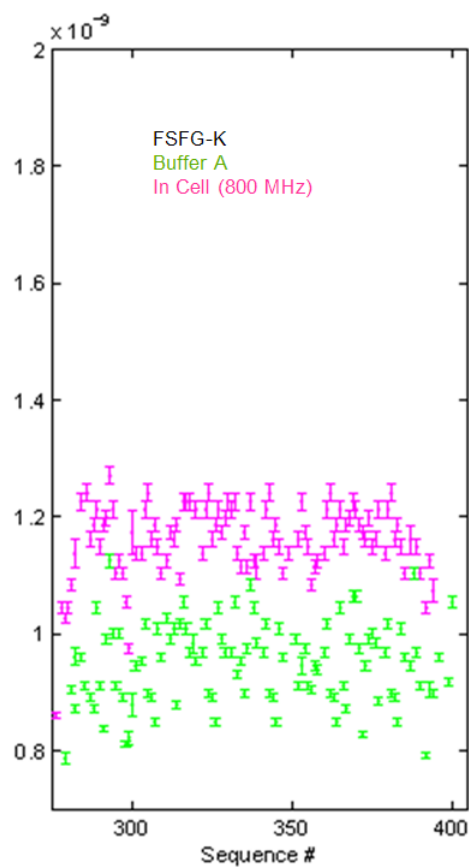

Supplement: supp [file elife_poa_e10027_Figure_1_figure_supplement_2.pdf › elife_poa_e10027_Figure_1_figure_supplement_2.pdf]

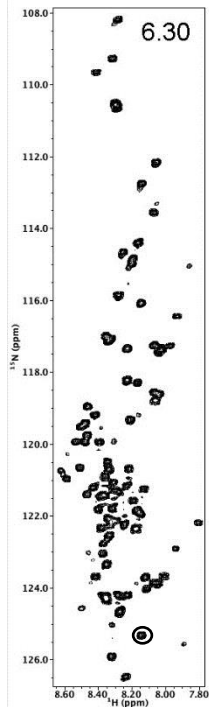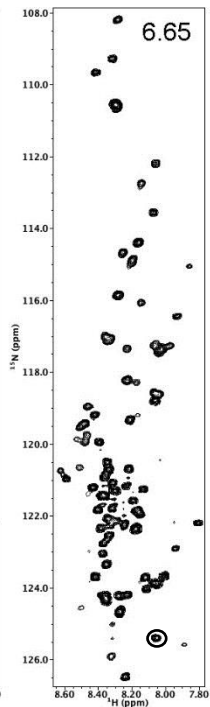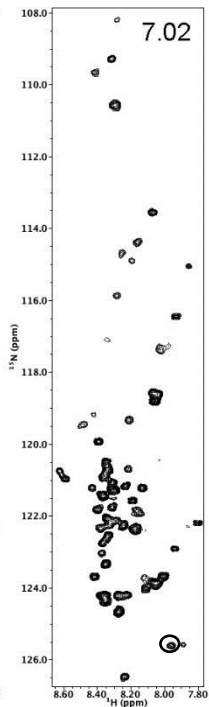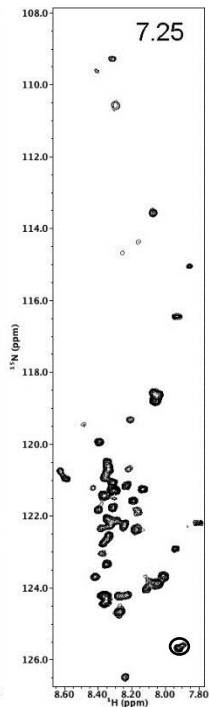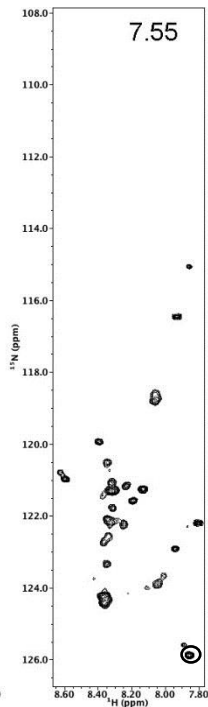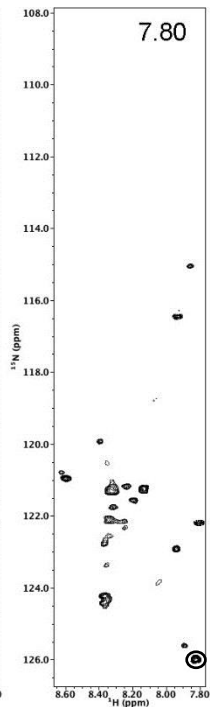

Supplement: supp [file elife_poa_e10027_Figure_1_figure_supplement_3.pdf › elife_poa_e10027_Figure_1_figure_supplement_3.pdf]

(FG-N)

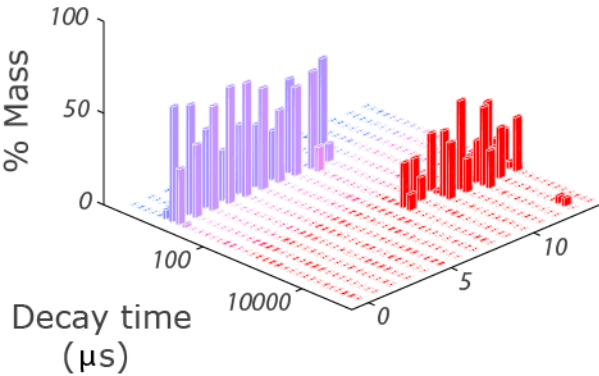

(FSFG-K)

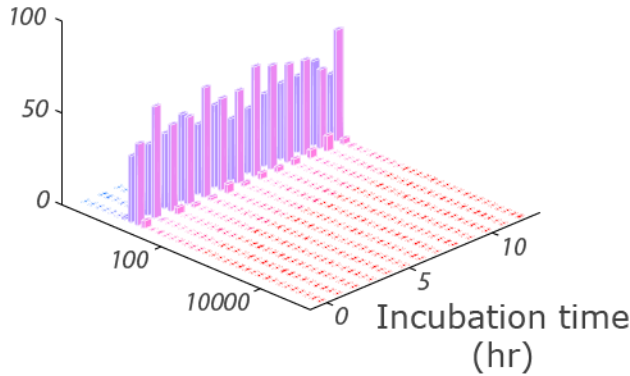

Supplement: supp [file elife_poa_e10027_Figure_1_figure_supplement_4.pdf › elife_poa_e10027_Figure_1_figure_supplement_4.pdf]

in cell

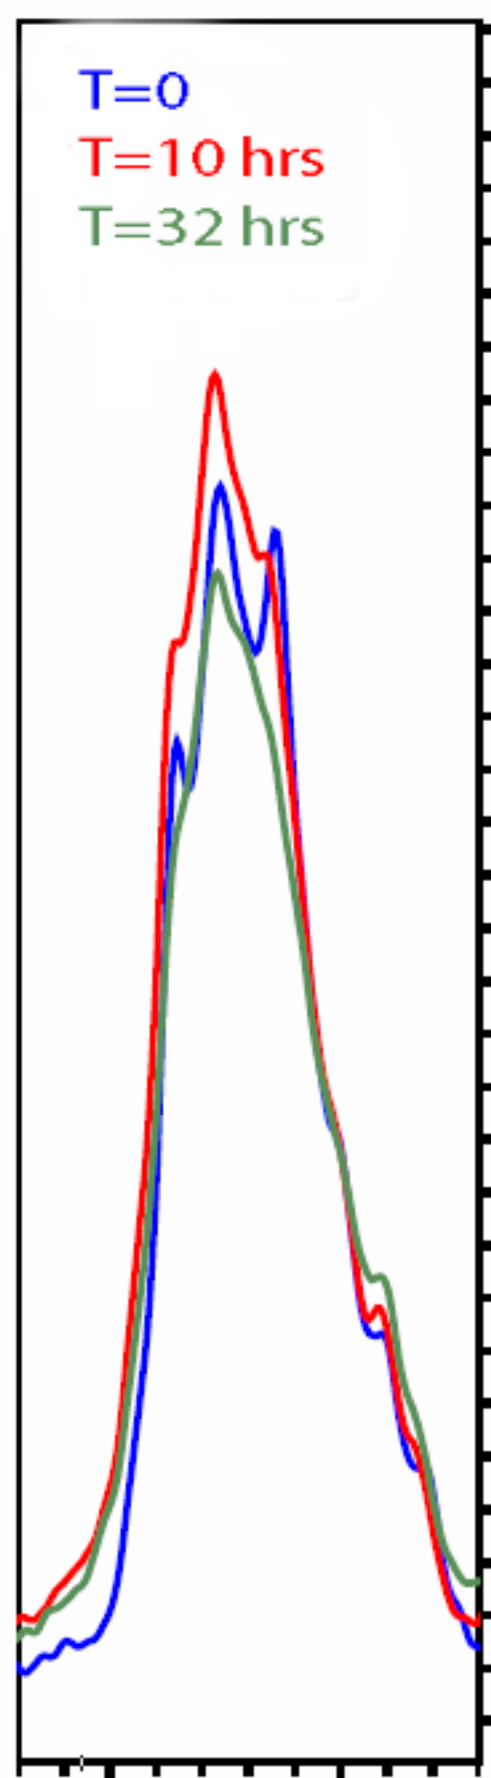

in buffer

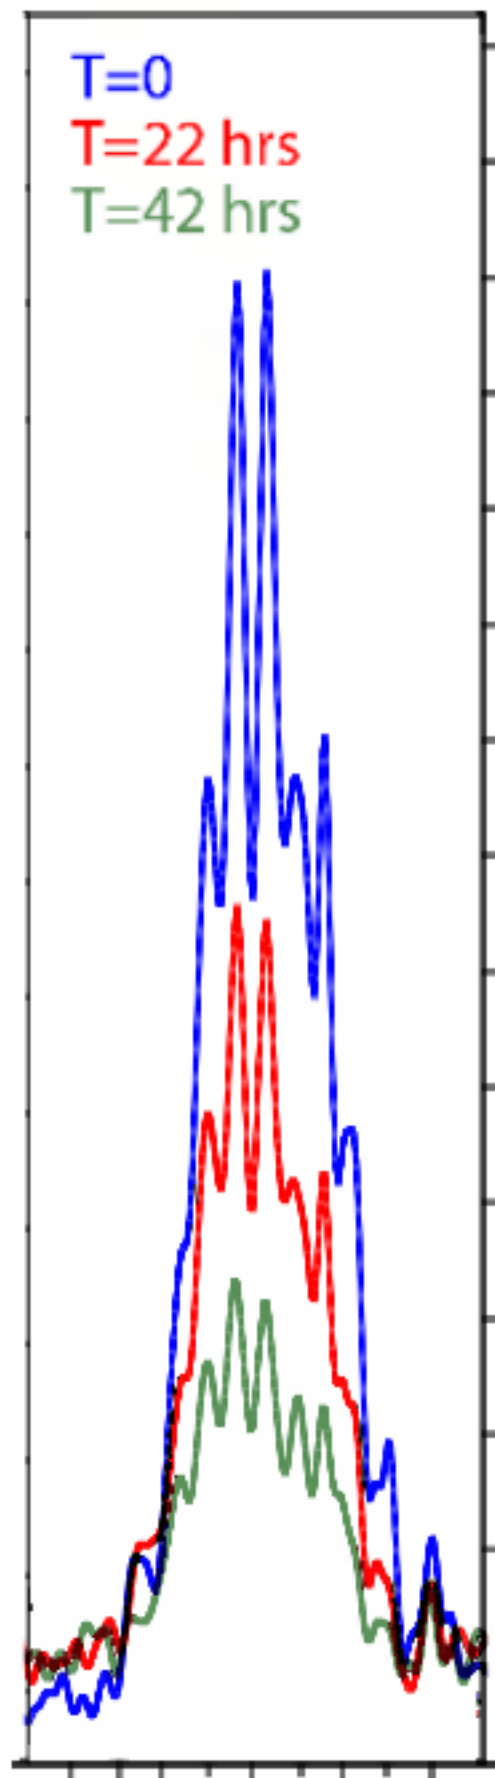

8.5

8.0

$^1\text{H}$  PPM

8.5

8.0

Supplement: supp [file elife_poa_e10027_Figure_1_figure_supplement_5.pdf › elife_poa_e10027_Figure_1_figure_supplement_5.pdf]

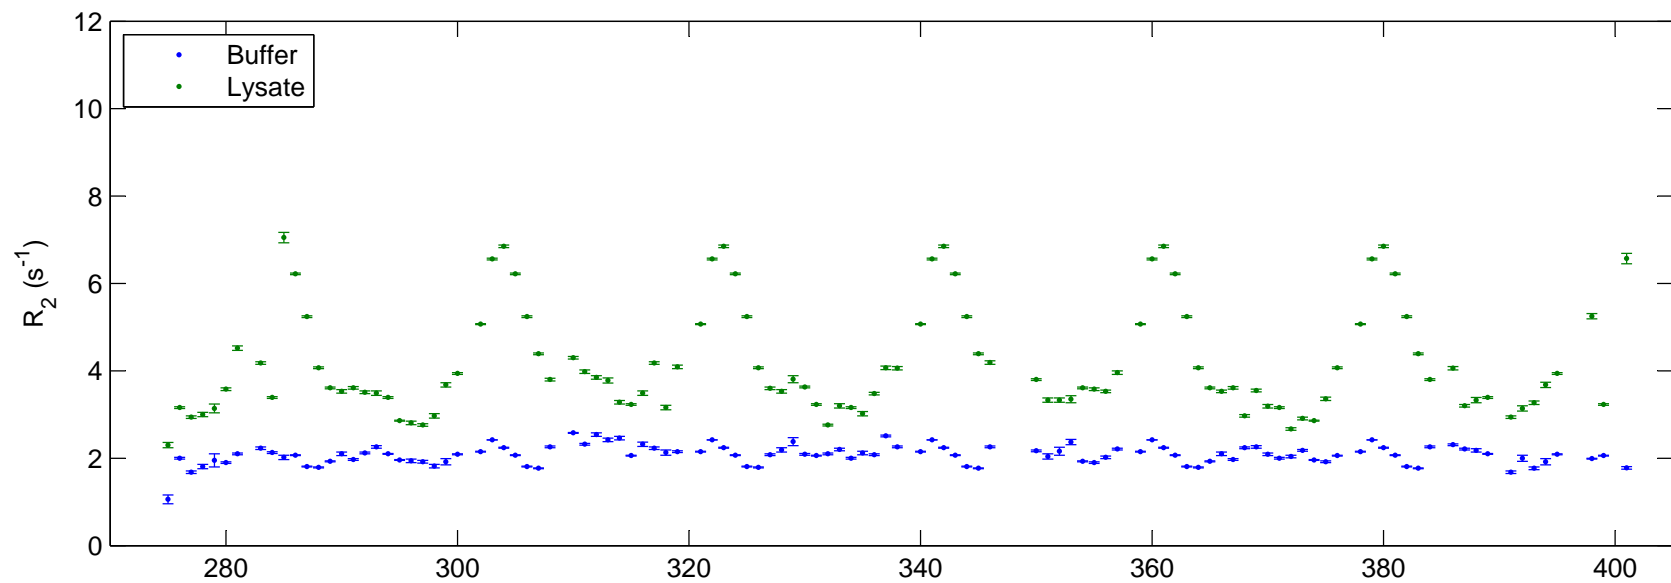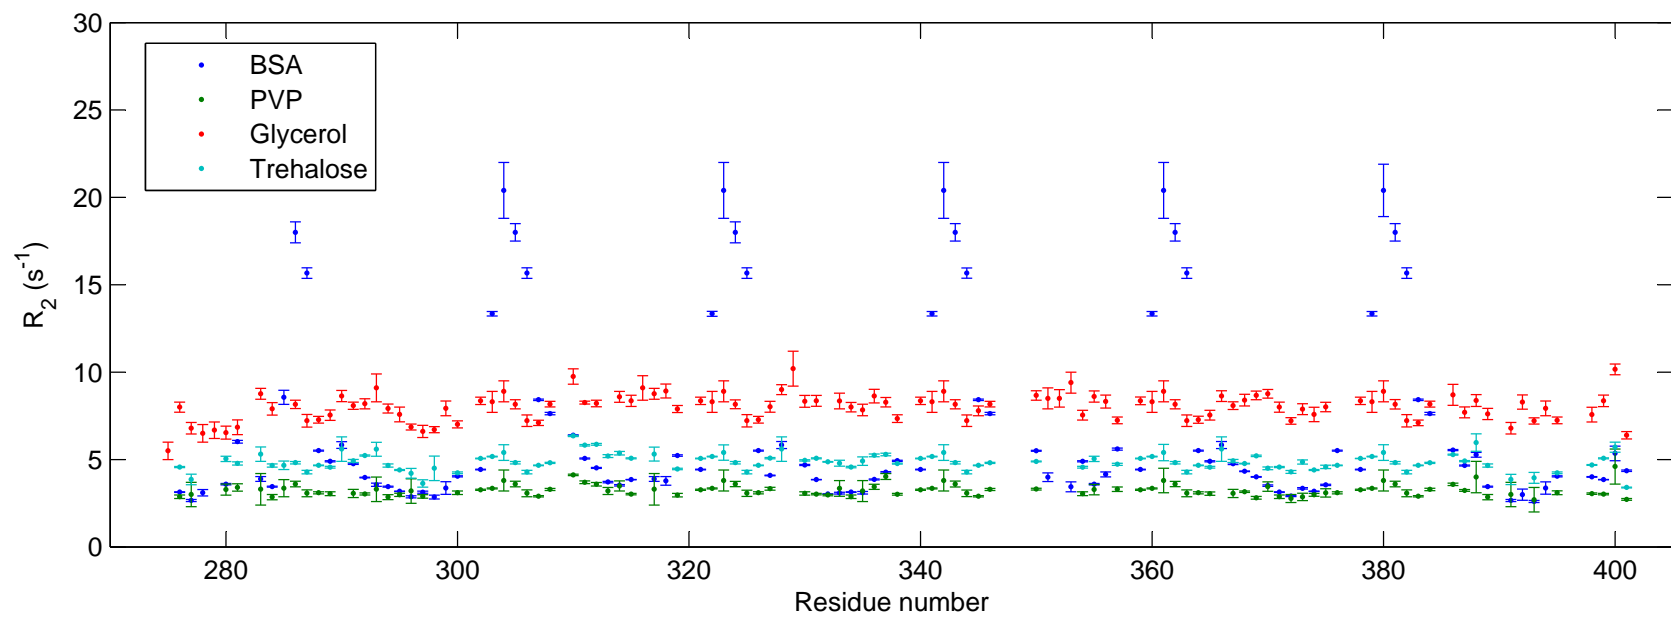

Supplement: supp [file elife_poa_e10027_Figure_1_figure_supplement_6.pdf › elife_poa_e10027_Figure_1_figure_supplement_6.pdf]

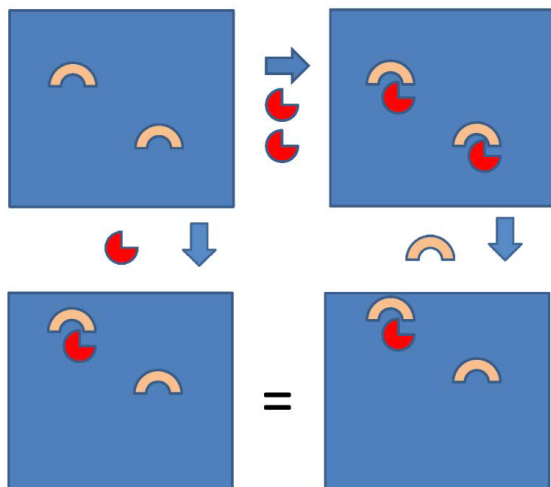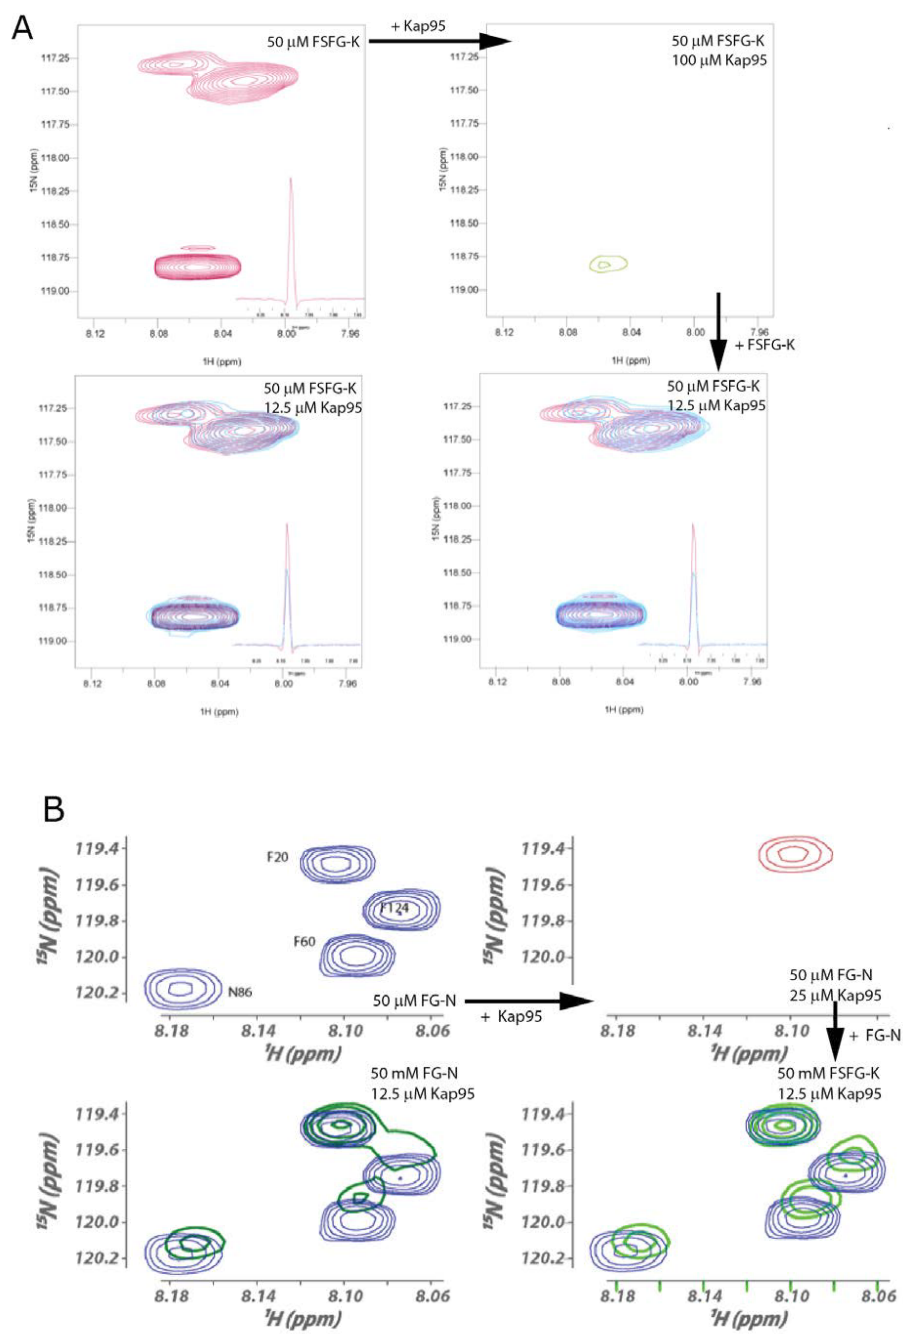

Supplement: supp [file elife_poa_e10027_Figure_2_figure_supplement_1.pdf › elife_poa_e10027_Figure_2_figure_supplement_1.pdf]

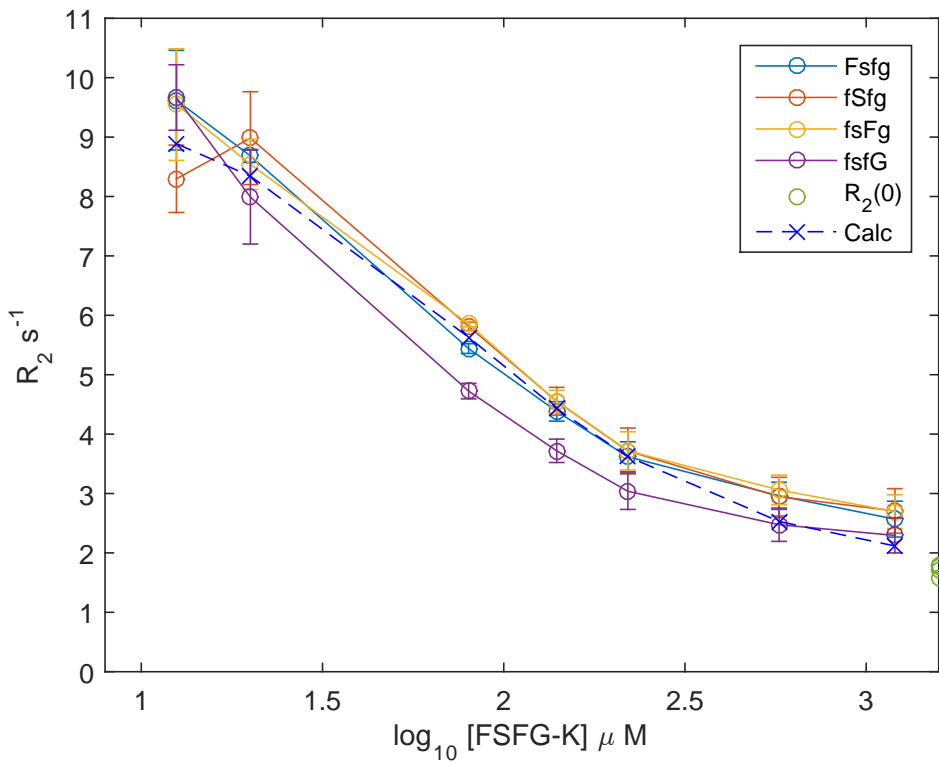

Supplement: supp [file elife_poa_e10027_Figure_2_figure_supplement_2.pdf › elife_poa_e10027_Figure_2_figure_supplement_2.pdf]
